# Supplementary material for: Nootkatone Supplementation Ameliorates Carbon Tetrachloride-Induced Acute Liver Injury via the Inhibition of Oxidative Stress, NF-κB Pathways, and the Activation of Nrf2/HO-1 Pathway
Source: MDPI journal article supplement (doi:10.3390/antiox12010194), 2023-01-13
Supplement: s1 [file s1]

### Supplementary File S1. Histopathological assessments

The liver tissues from four mice in each group were fixed in 4% neutral formaldehyde for the histopathological analysis. The liver tissues were treated with a series of gradient ethanol dehydration, transparency, embedding, and section, and hematoxylin-eosin staining was performed according to the previous study [3]. Furthermore, the degree of liver injury was scored using a semi-quantitative score (SQS) system, according to the previous study [3], as follows: Grade 0 showed no marked pathological change. Grade 1 showed the presence of hepatocyte degeneration with small rare of foci of necrosis. Grade 2 showed the small area of mild centrilobular necrosis around the central vein. Grade 3 showed the area of mild centrilobular necrosis that is severer than Grade 2. Grade 4 showed the centrilobular necrosis that is severer than Grade 3.

**Supplementary Table S1.** Primer sequences of the quantitative real-time PCR.

| Gene name    | Gene accession number | Direction | Primer sequence (5'to 3')       |
|--------------|-----------------------|-----------|---------------------------------|
| <i>NF-kB</i> | NM_008689             | forward   | 5'- GCTGCCAAAGAAGGACACGACA -3'  |
|              |                       | reverse   | 5'-GGCAGGCTATTGCTCATCACAG -3'   |
| <i>Nrf2</i>  | NM_010902             | forward   | 5'- CAGCATAGAGCAGGACATGGAG -3'  |
|              |                       | reverse   | 5'- GAACAGCGGTAGTATCAGCCAG -3'  |
| <i>HO-1</i>  | NM_010442             | forward   | 5'- CACTCTGGAGATGACACCTGAG -3'  |
|              |                       | reverse   | 5'- GTG TTCCTCTGTCAGCATCACC -3' |

|                |           |         |                            |
|----------------|-----------|---------|----------------------------|
|                |           |         | 5'-                        |
|                |           | forward | CATTGCTGACAGGATGCAGAAGG -  |
| <i>β-actin</i> | NM_007393 |         | 3'                         |
|                |           |         | 5'- TGCTGGAAGGTGGACAGTGAGG |
|                |           | reverse | -3'                        |

---
